# Supplementary material for: Diversity, prevalence, and expression of cyanase genes (cynS) in planktonic marine microorganisms
Source: PubMed Central journal article supplement (PMC8776842; doi:10.1038/s41396-021-01081-y), 2021-08-18
Supplement: 41396_2021_1081_MOESM10_ESM.pdf [file 41396_2021_1081_MOESM10_ESM.pdf]

DinoSL

M A E

1 TCCGTAGCCATTTTGGCTCAAGCAGCGGAAGCTTCCAGAGAGGGGCAGGAAGATGGCGGA 60  
 -----:-----|-----:-----|-----:-----|-----:-----|-----:-----|-----:-----|  
 L P P A K R A R V D D E K A T L V A R L

61 GCTACCGCCGGCCAAGCGGGCTCGGGTGGACGATGAGAAGGCCACCCTGGTGGCGCGGCT 120  
 -----:-----|-----:-----|-----:-----|-----:-----|-----:-----|-----:-----|  
 L A A K E A S G K S F D E I A A A L G L

121 CCTGGCAGCCAAGGAGGCCAGCGGCAAGTCCTTCGACGAGATCGCGGGCGGCCCTGGGCCT 180  
 -----:-----|-----:-----|-----:-----|-----:-----|-----:-----|-----:-----|  
 T N A Y T A N L F F N Q A Q L K P G T S

181 CACGAACGCCTACACGGCGAACCTCTTCTTCAACCAGGCCAGCTCAAGCCAGGGACTTC 240  
 -----:-----|-----:-----|-----:-----|-----:-----|-----:-----|-----:-----|  
 E K L T A I V P G I S P E D L R A M Q R

241 GGAGAAGCTGACTGCGATCGTGCCAGGCATCTCGCCAGAAGATCTCCGAGCCATGCAGCG 300  
 -----:-----|-----:-----|-----:-----|-----:-----|-----:-----|-----:-----|  
 A P M R G F G P A I L Q E P N V Y R T Y

301 CGCGCCGATGCGCGGCTTCGGCCCCGCCATCCTCCAGGAGCCCAACGTCTACCGGACGTA 360  
 -----:-----|-----:-----|-----:-----|-----:-----|-----:-----|-----:-----|  
 E A V T H Y G E A I K A L I N E Q C G D

361 CGAGGCCGTGACGCACTACGGGGAGGCCATCAAGGCGCTGATCAACGAGCAGTGCGGGGA 420  
 -----:-----|-----:-----|-----:-----|-----:-----|-----:-----|-----:-----|  
 G I M S A I D F Y L D V G T T T G K K G

421 CGGCATCATGAGCGCCATCGACTTCTATCTGGACGTAGGCACGACCACCGGCAAGAAGGG 480  
 -----:-----|-----:-----|-----:-----|-----:-----|-----:-----|-----:-----|  
 E K R V V I T M N G K F L P H I E Q V A

481 CGAGAAGCGCGTGGTCATCACCATGAACGGCAAGTTCCTGCCCCACATTGAGCAGGTGGC 540  
 -----:-----|-----:-----|-----:-----|-----:-----|-----:-----|-----:-----|  
 A D N T V P G P R D \*

541 GGCCGACAACACGGTGCCCGGCCCGAGGGACTGAGCCGCAAGCGGGTGGAGAGCGGCGCT 600

601 GCGGCCGCTGCAGGGCAGTTTGCTGCAGGACATCGCGTGGGTTCCTGCACCCTCAAAAAAA 660

661 AAAAAAAA 668
