# Supplementary material for: Diversity, prevalence, and expression of cyanase genes (cynS) in planktonic marine microorganisms
Source: PubMed Central journal article supplement (PMC8776842; doi:10.1038/s41396-021-01081-y), 2021-08-18
Supplement: 41396_2021_1081_MOESM11_ESM.pdf [file 41396_2021_1081_MOESM11_ESM.pdf]

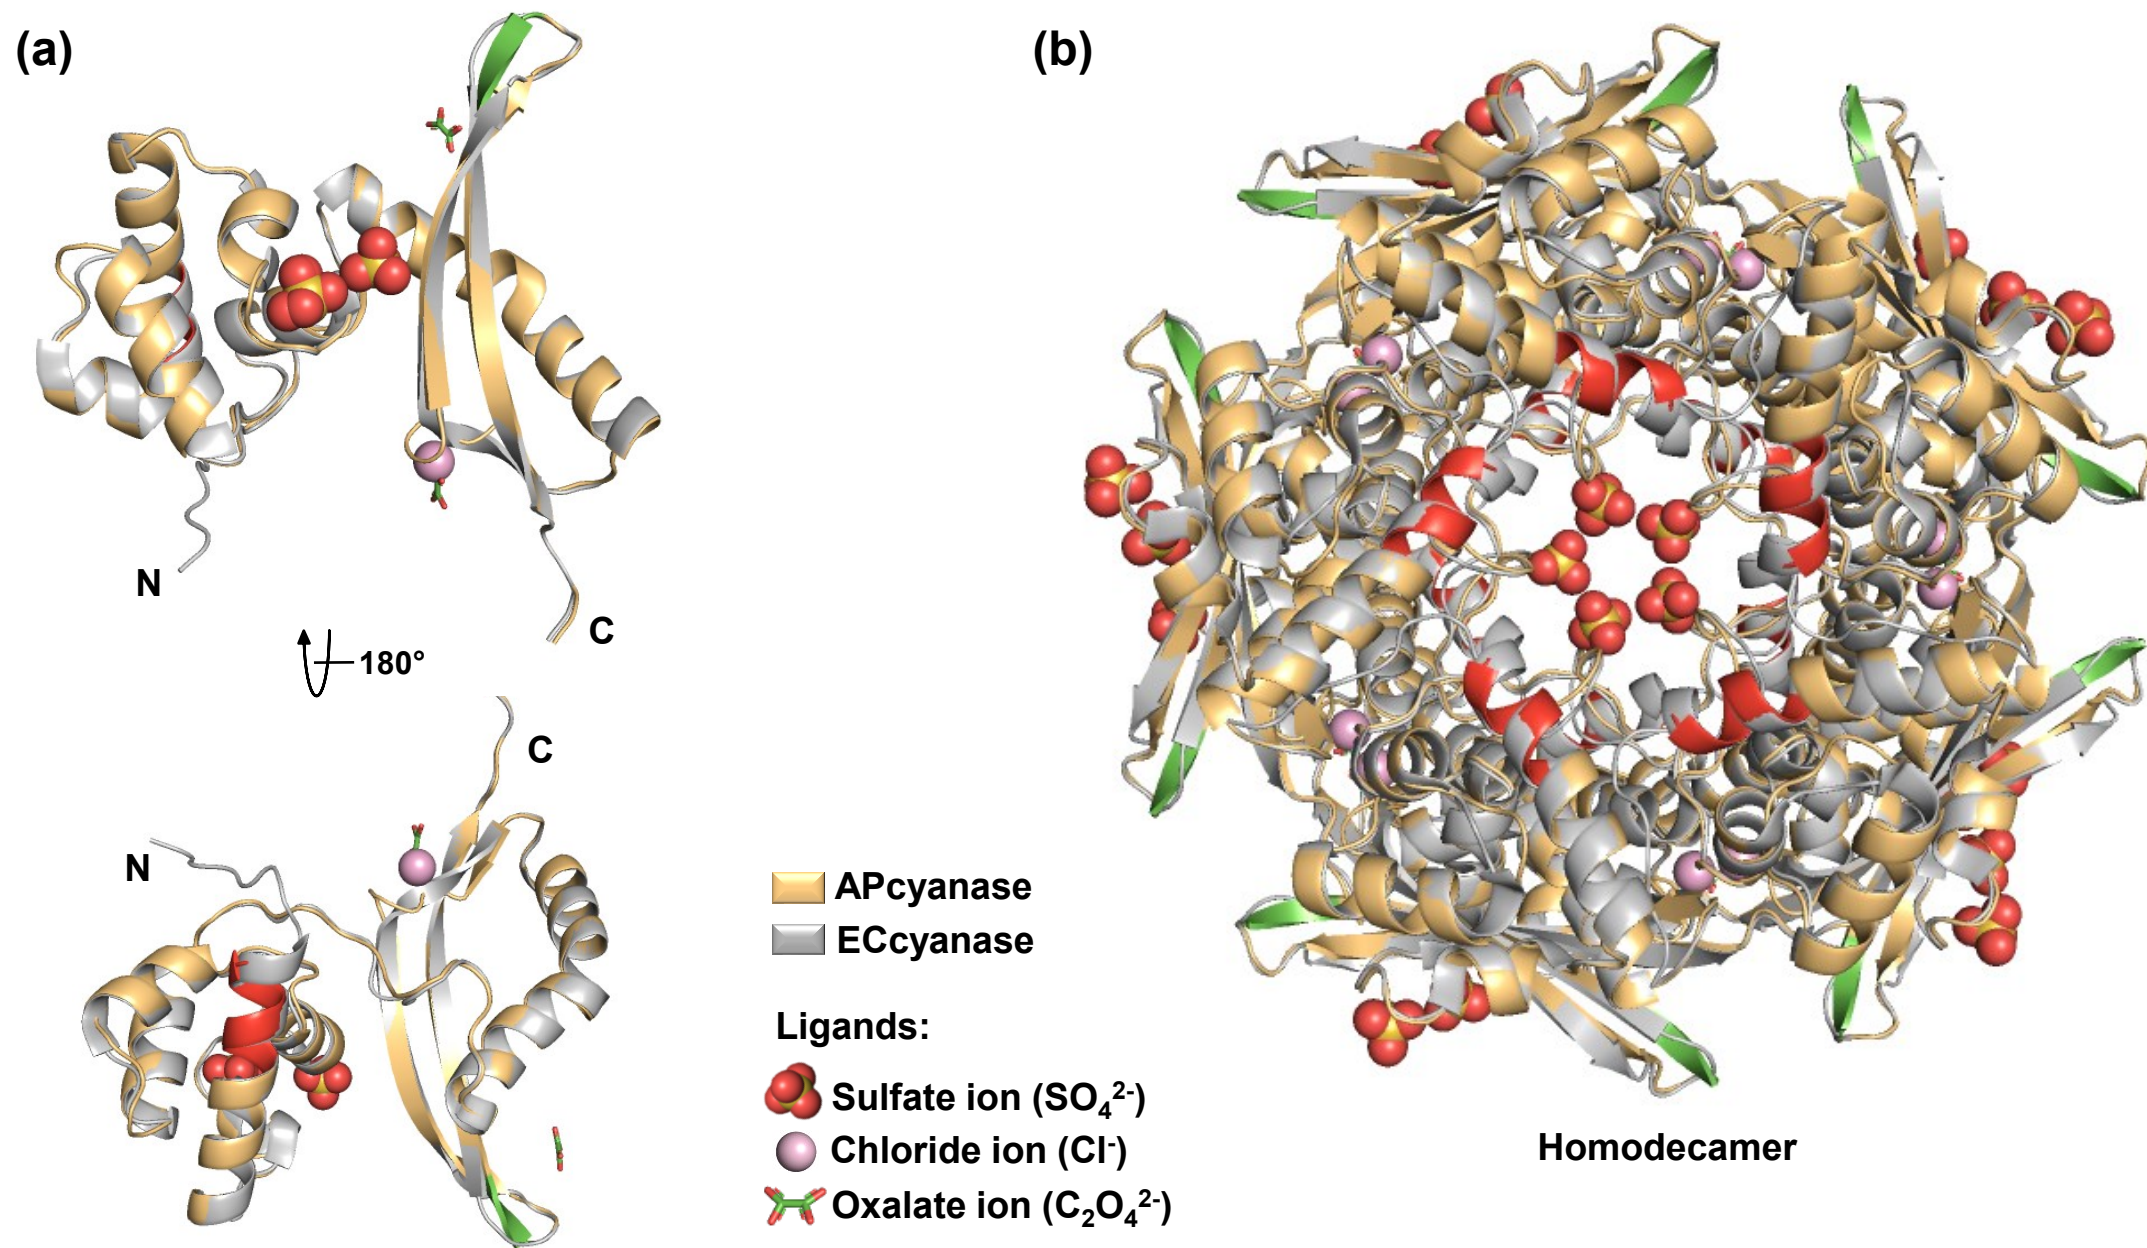

|           |    |                                                                                                                                                                     |     |                   |
|-----------|----|---------------------------------------------------------------------------------------------------------------------------------------------------------------------|-----|-------------------|
| APcyanase | 1  | MAELPPAKR <del>ARVDDEKATLVARLLAAKEASGKS</del> <del>SFDEIAAALGLTNA</del> YTANLFFNQAQLKPGTSEKLT <del>AI</del> IVPGISPEDLRAMQR                                         | 83  | N-terminal domain |
| ECcyanase | 1  | MIQSQINRNIRLD <del>LADAILLSKAKK</del> <del>LSFAE</del> <del>IADGTGLAEAFVTAALLG</del> Q <del>QALPADAARLVGA</del> KL-DLDEDAILLQM                                      | 77  |                   |
| APcyanase | 84 | A-PMRGFGPAILQ <del>EPNVYRTYEAVTHYGEAIKALINEQC</del> <del>GDGIMS</del> <del>AIDFYLOV</del> GTTTGKKG <del>EKR</del> <del>VVTMN</del> <del>GKFLPHIEQVAADNTVPGPRD</del> | 173 | C-terminal domain |
| ECcyanase | 78 | IPLRGCIDDRIPTD <del>PTMYRFYEMLQVY</del> <del>GTTLKALVHEK</del> <del>FGDGI</del> <del>SAINFKLOV</del> KKVADPE <del>GGE</del> <del>FAVITLDGKYL</del> PTKPF            | 156 |                   |

$\alpha$ -helix
   $\beta$ -sheet
