# Supplementary material for: Diversity, prevalence, and expression of cyanase genes (cynS) in planktonic marine microorganisms
Source: PubMed Central journal article supplement (PMC8776842; doi:10.1038/s41396-021-01081-y), 2021-08-18

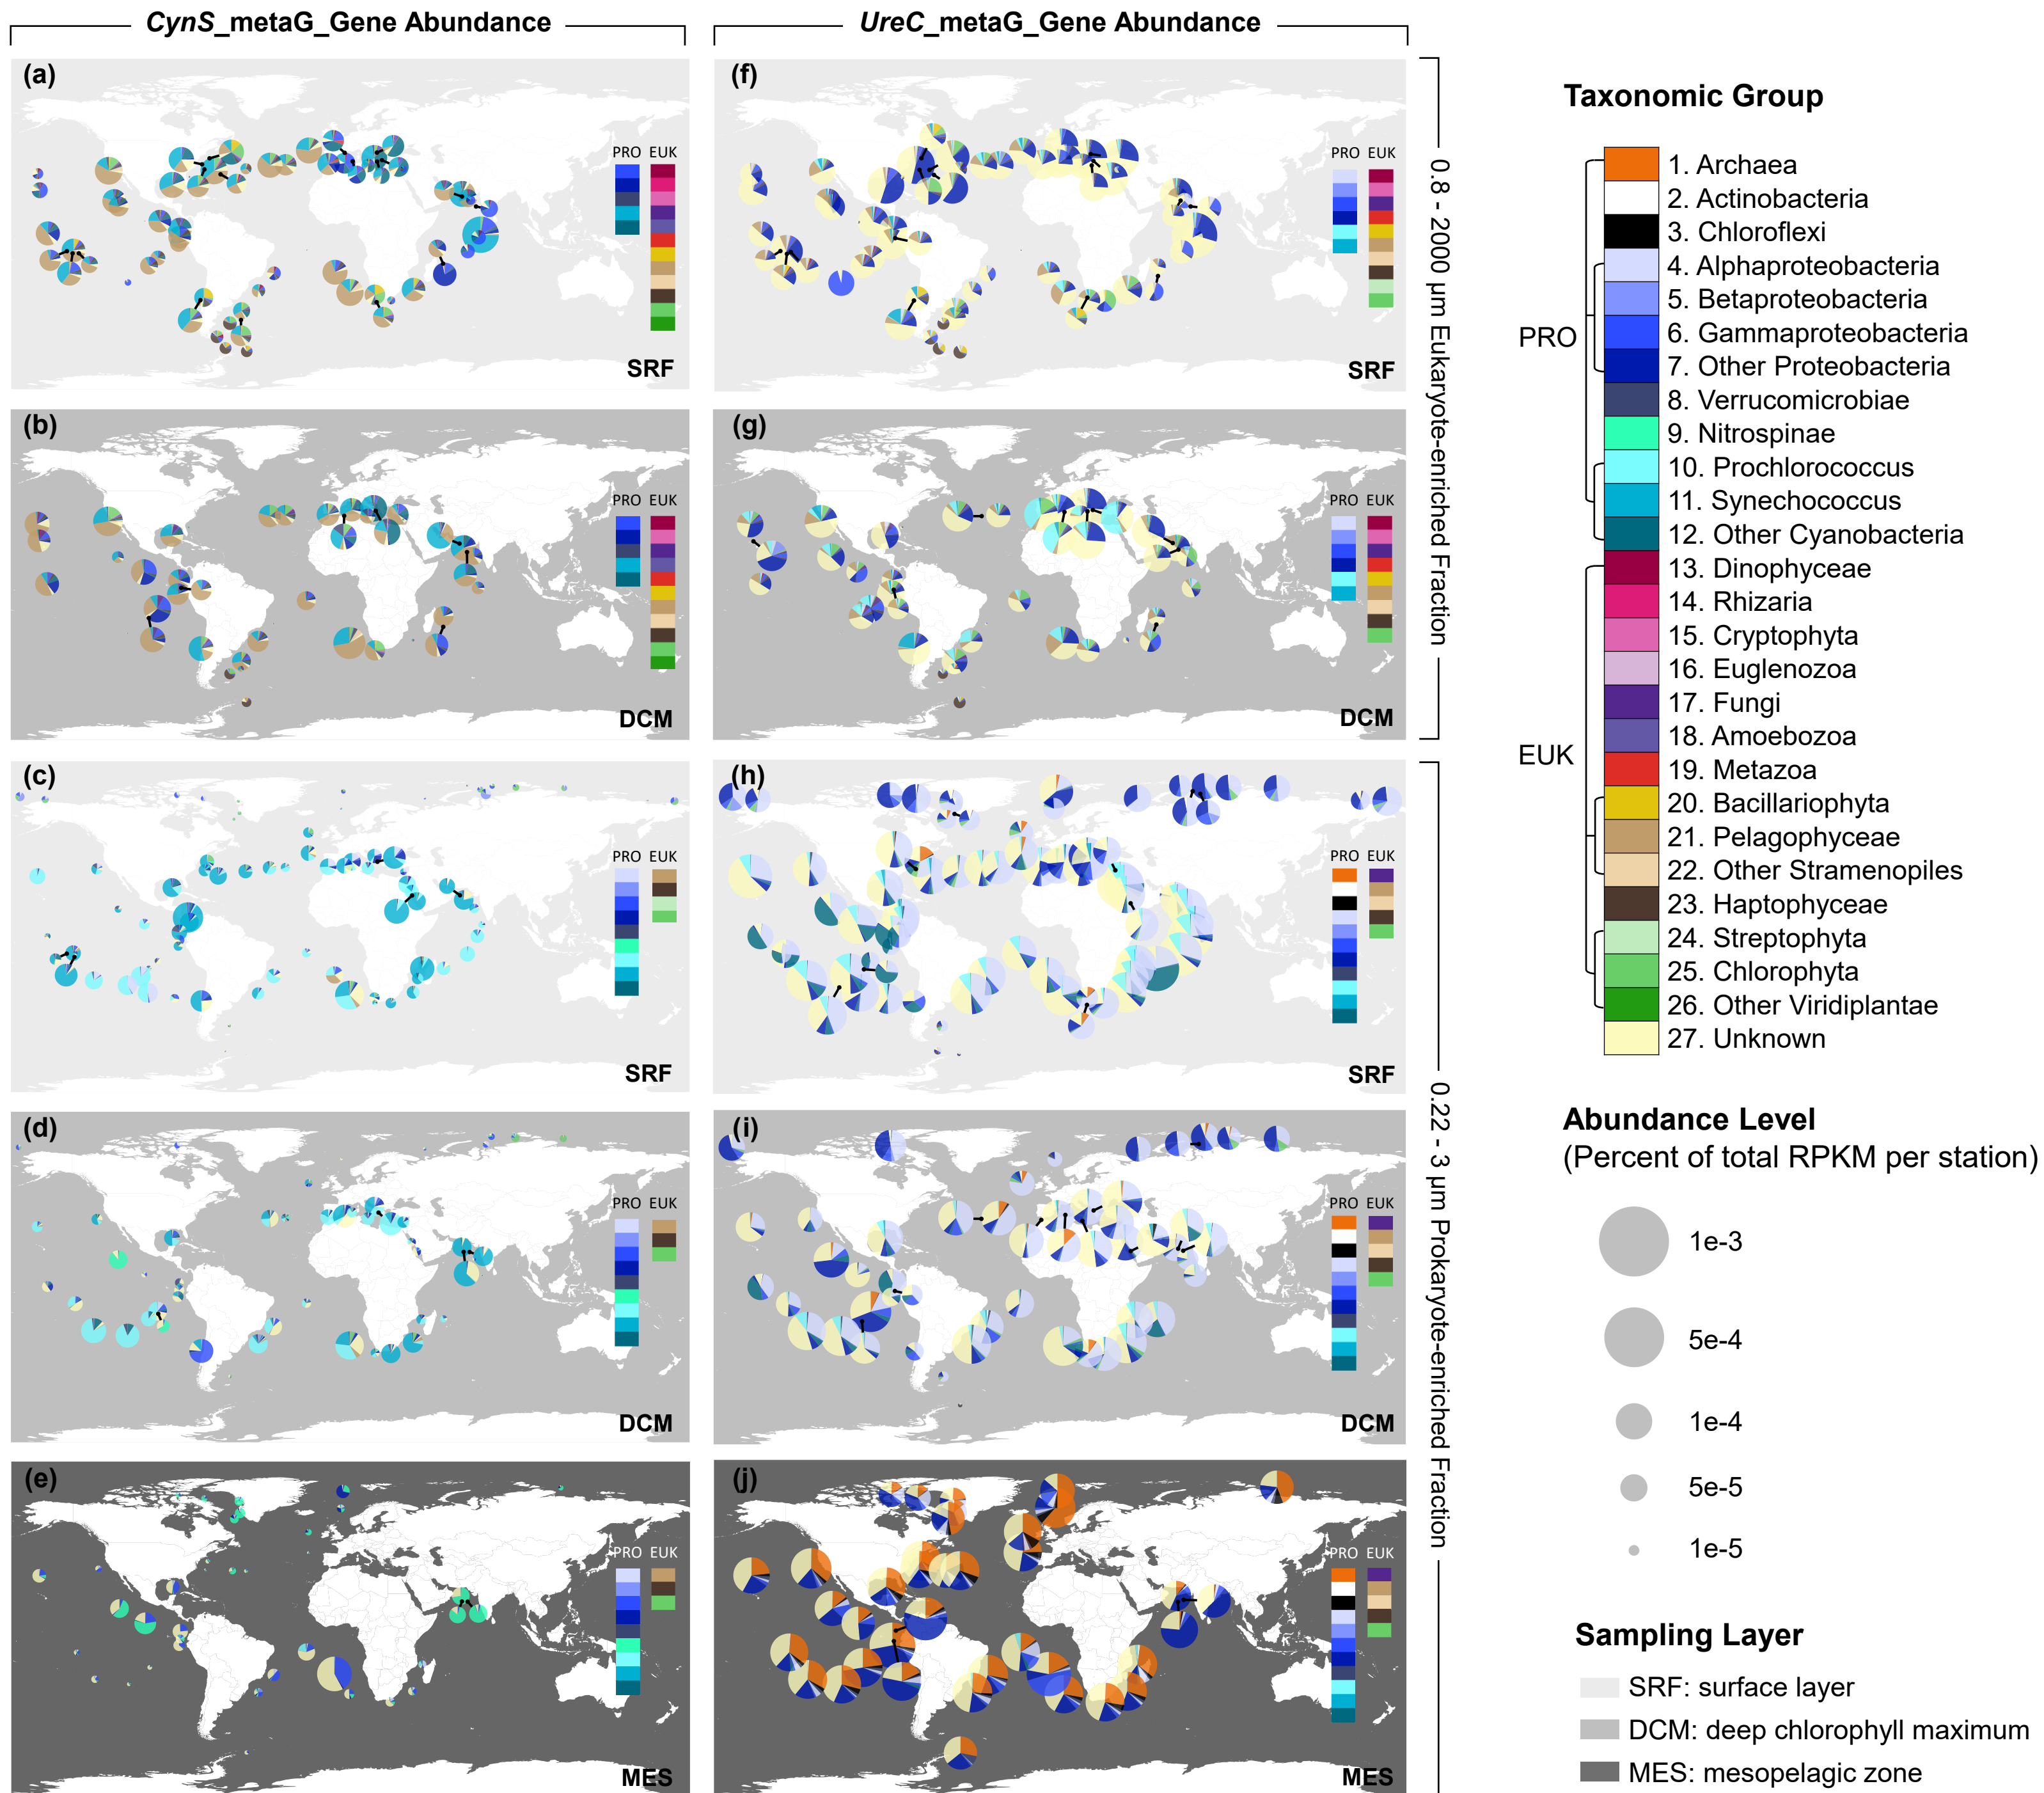

Supplement: 41396_2021_1081_MOESM13_ESM.pdf [file 41396_2021_1081_MOESM13_ESM.pdf]
