# Supplementary material for: Diversity, prevalence, and expression of cyanase genes (cynS) in planktonic marine microorganisms
Source: PubMed Central journal article supplement (PMC8776842; doi:10.1038/s41396-021-01081-y), 2021-08-18

(a) Gene Expression (0.8-2000  $\mu\text{m}$  fraction)

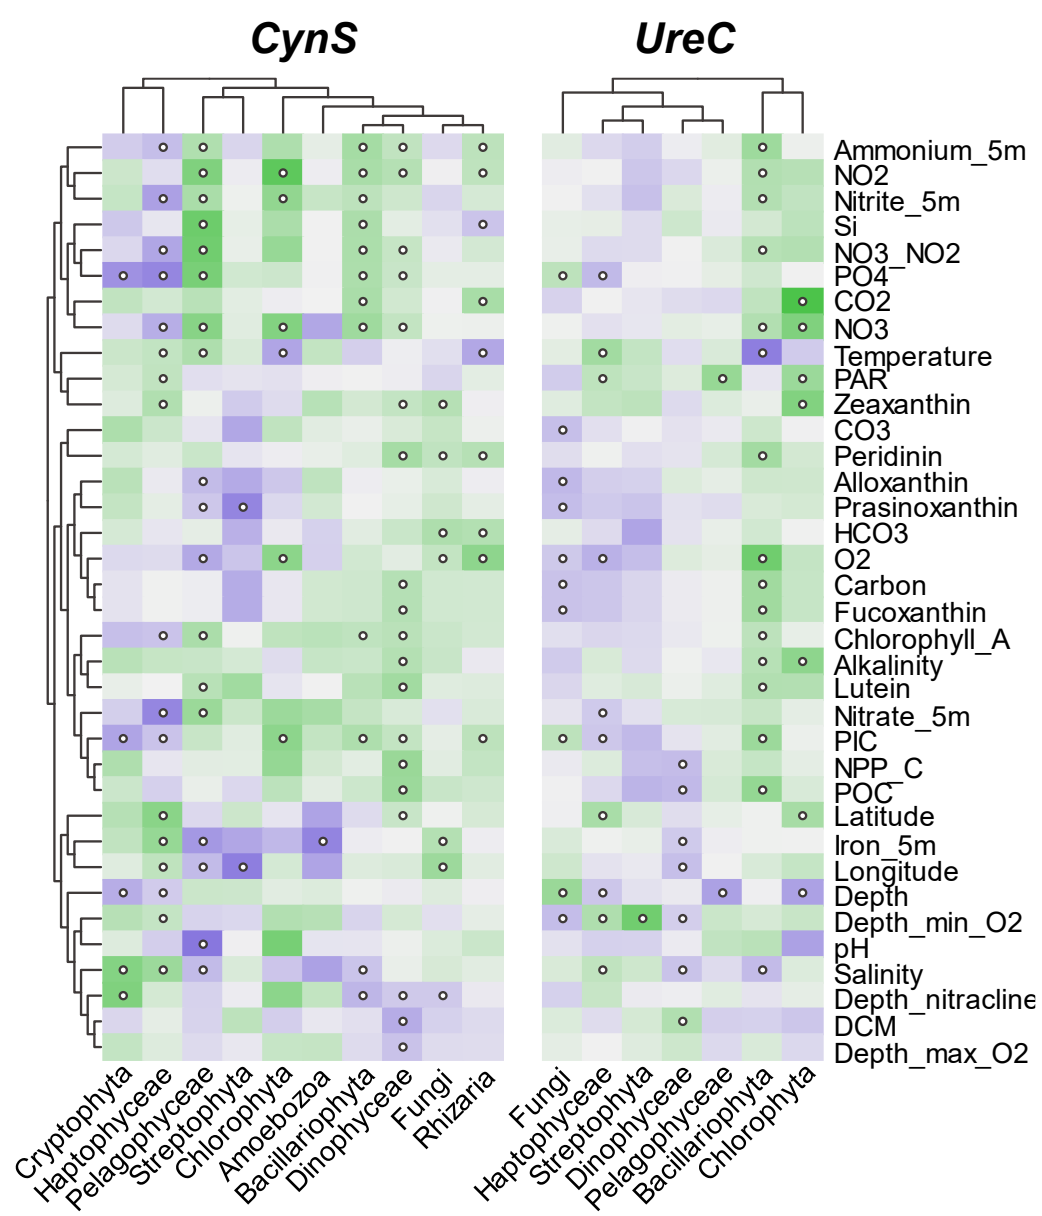

(b) Gene Expression (0.22-3  $\mu\text{m}$  fraction)

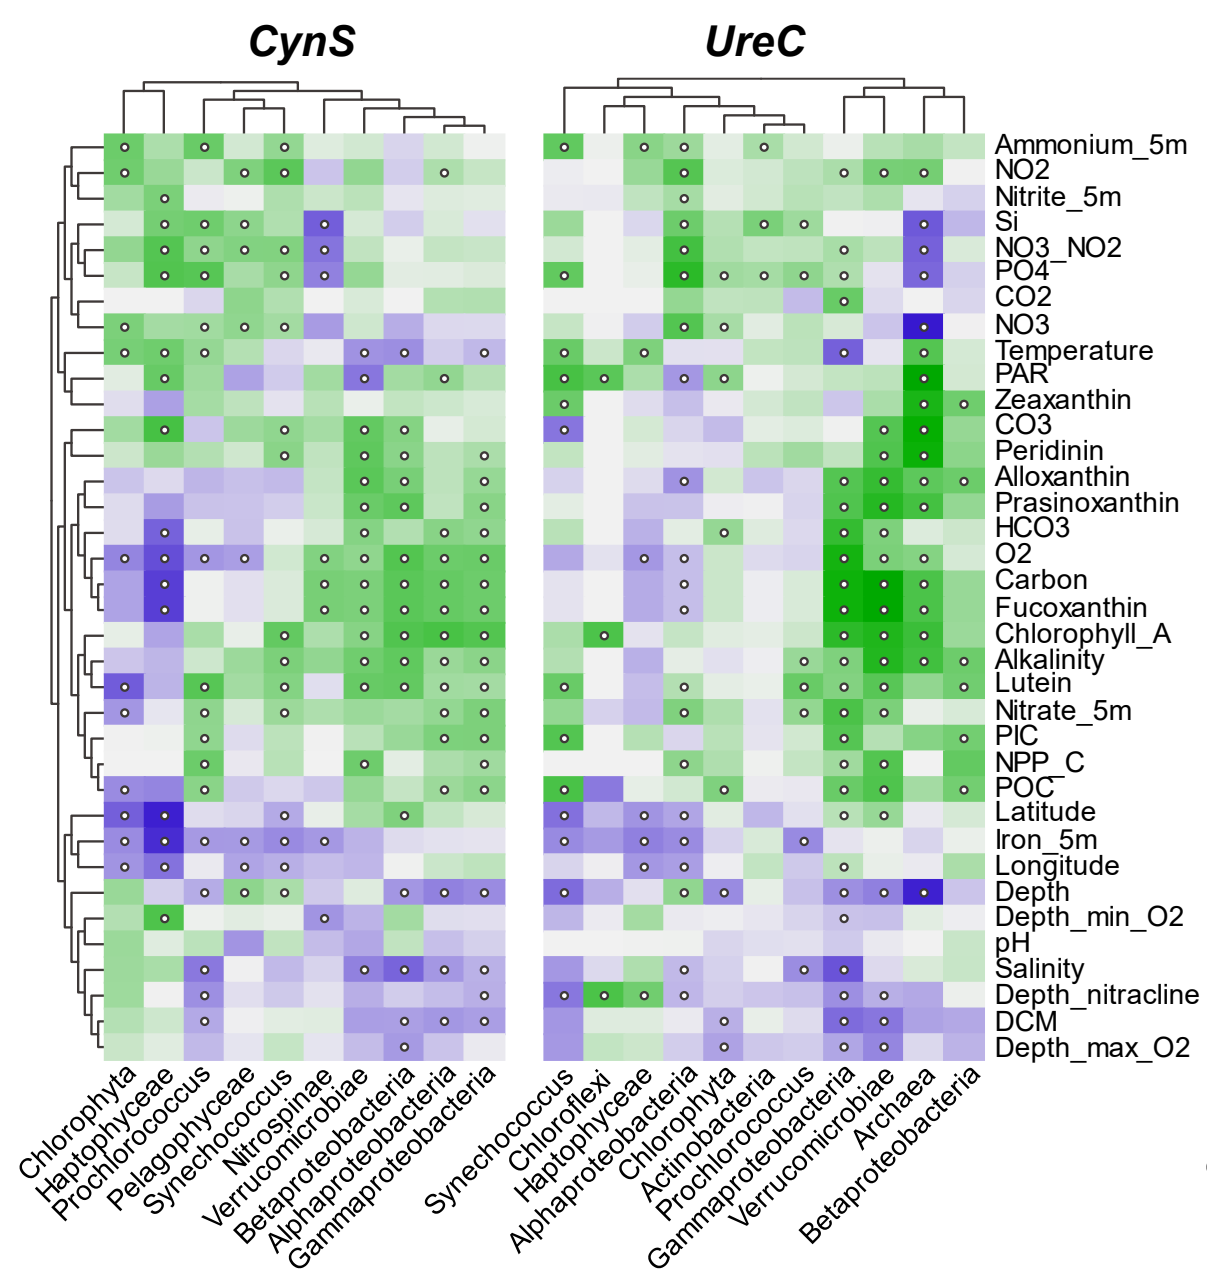

Correlation

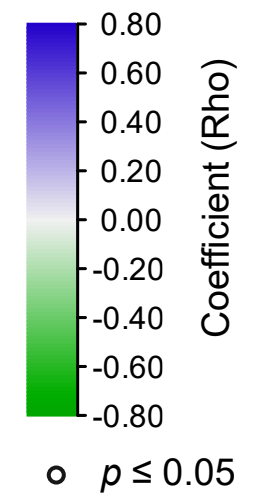

(c) Gene Abundance (0.8-2000  $\mu\text{m}$  fraction)

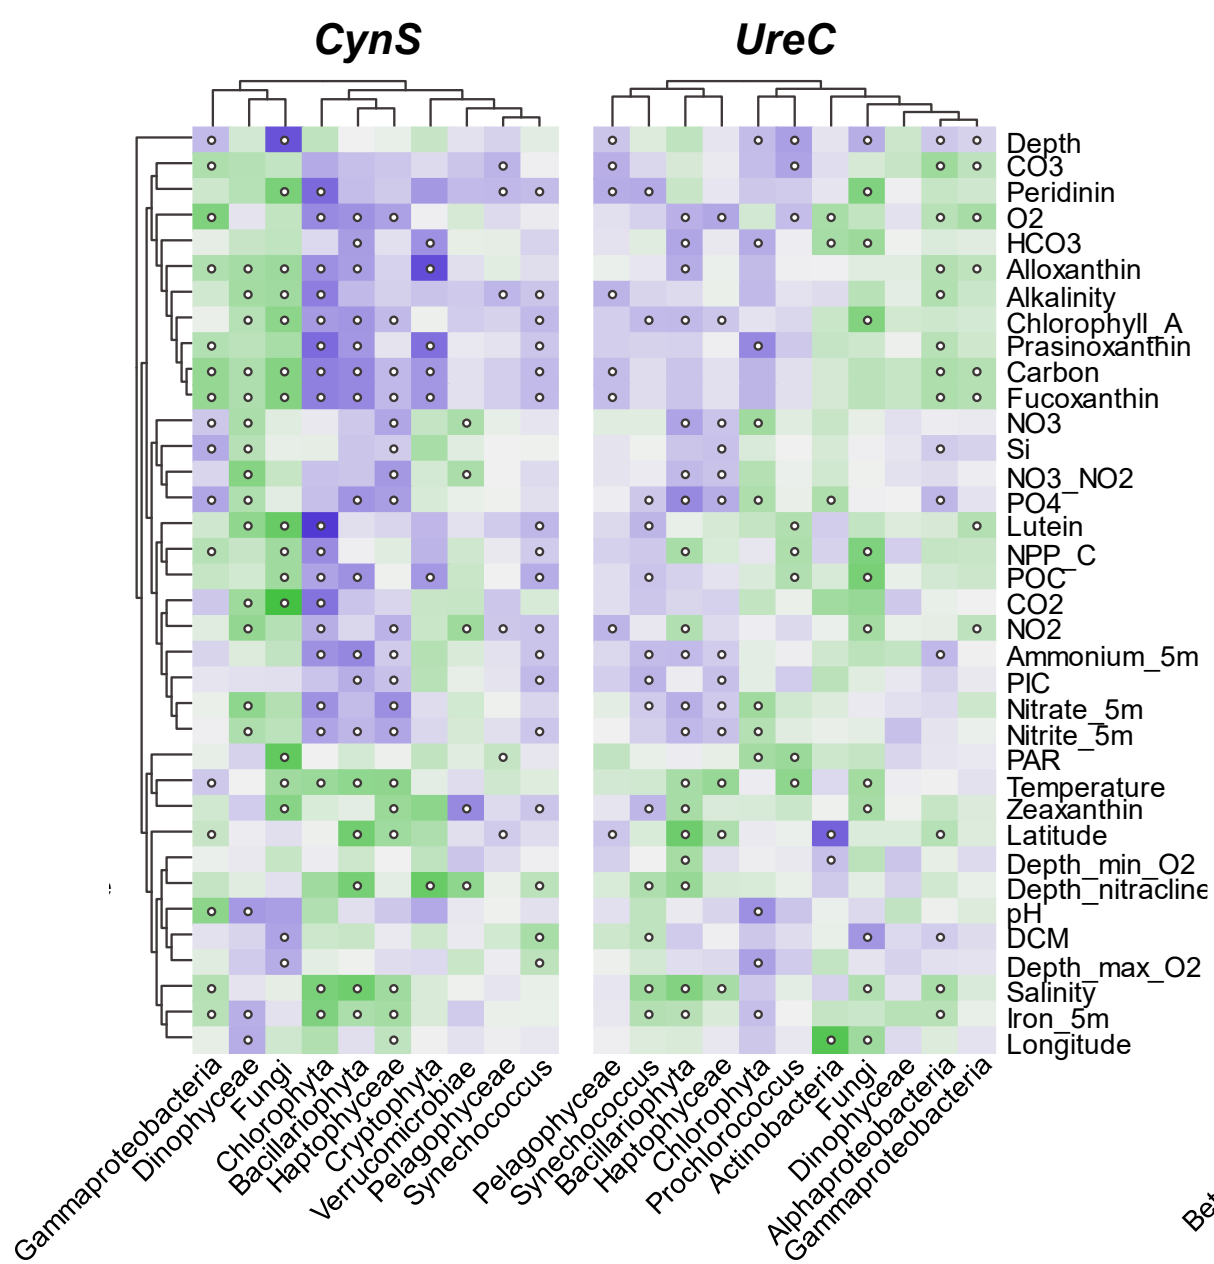

(d) Gene Abundance (0.22-3  $\mu\text{m}$  fraction)

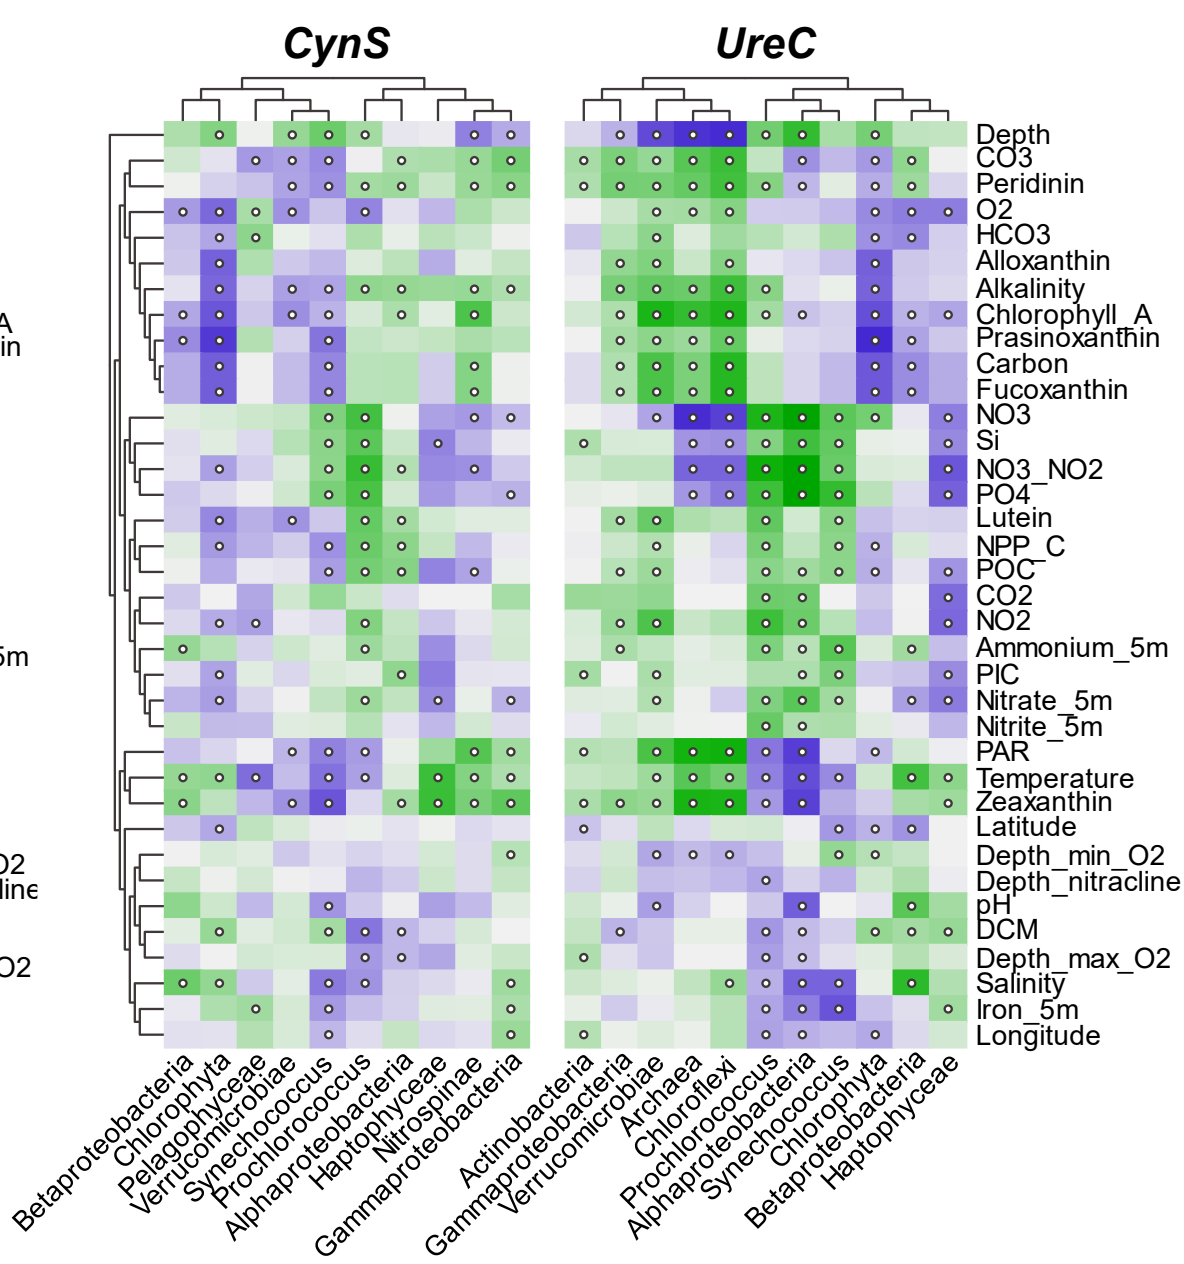

Supplement: 41396_2021_1081_MOESM14_ESM.pdf [file 41396_2021_1081_MOESM14_ESM.pdf]
